# Supplementary material
Source: Springer Nature journal article supplement (https://www.springermedizin.de/resource/supplementary/13054_2011_9741_MOESM3_ESM.pdf/9706672)

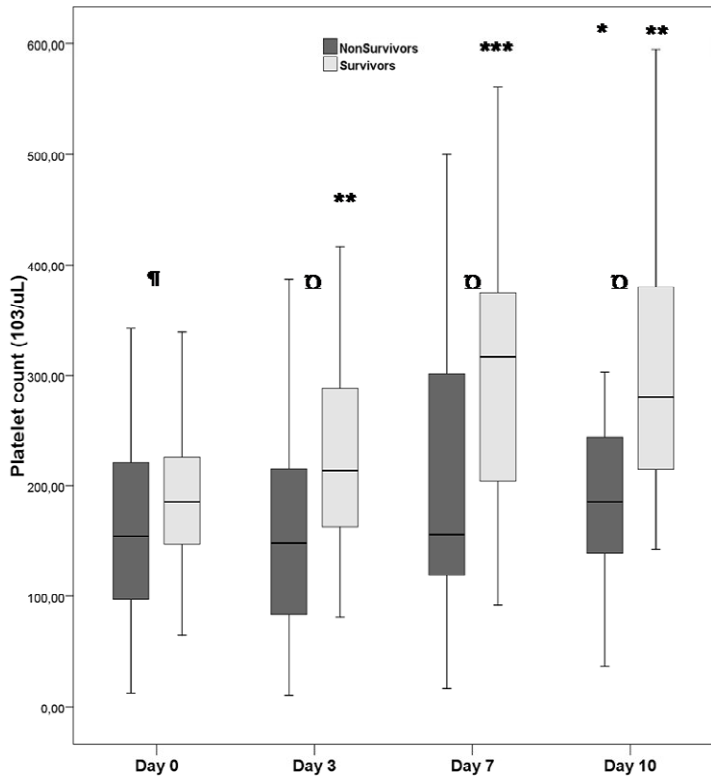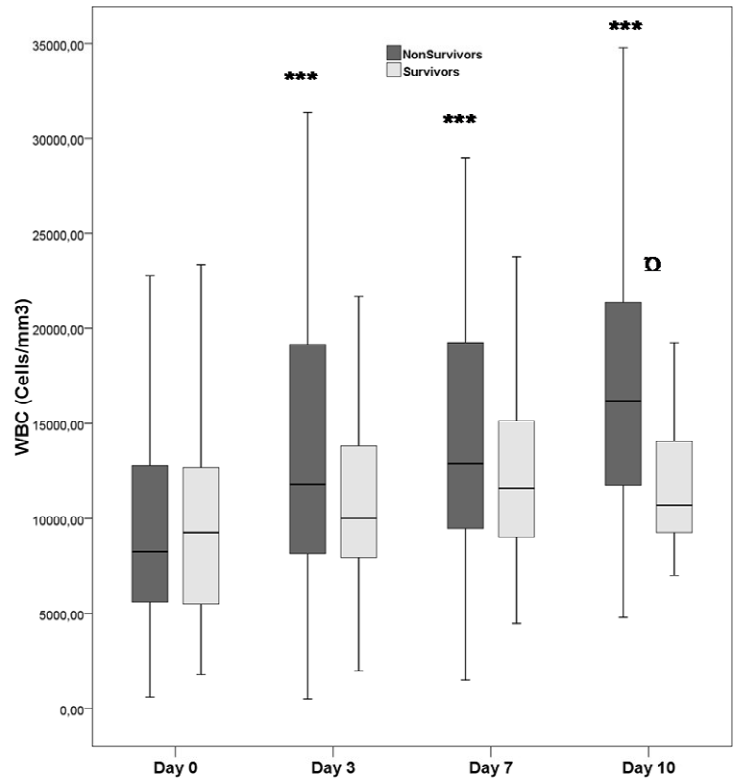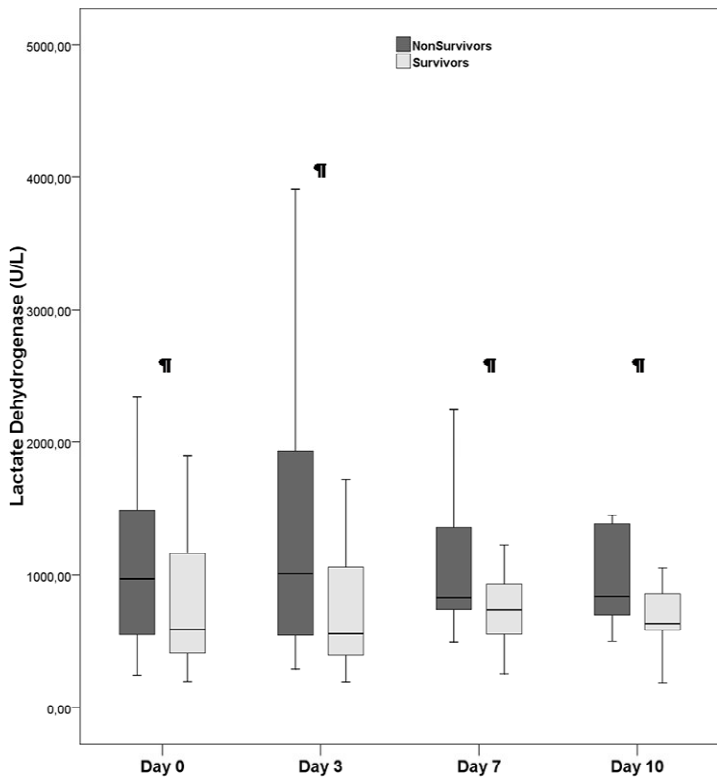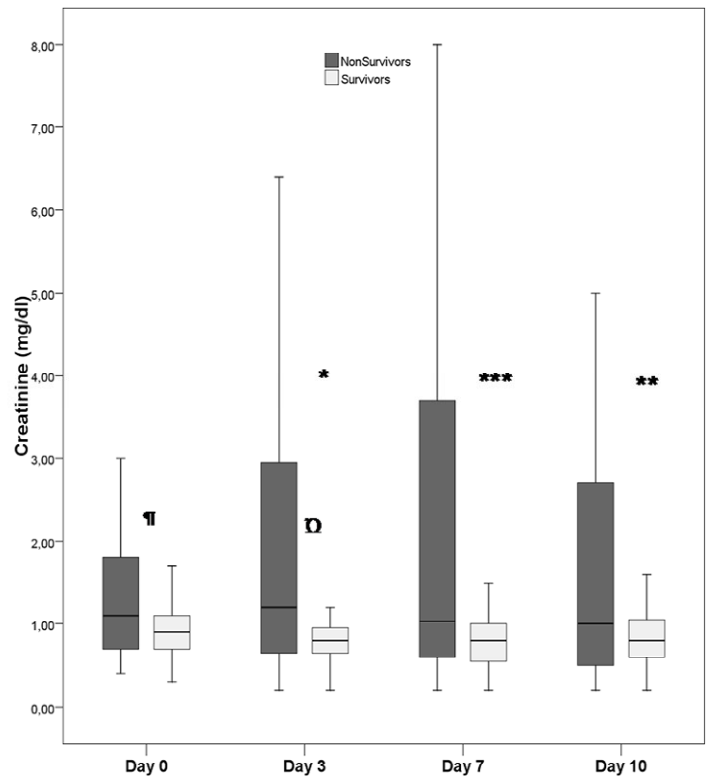

For intragroup comparisons over time: \*\*\* P < .000; \*\* P < .001; \* P < .05  
 For intergroup comparisons at each time point: ¶ P < .000; ¶ P < .05

Supplement: MOESM3 [file 9706672]
